# Supplementary material for: Reduced Lipid Peroxidation Predicts Unfavorable Prognosis in Hepatocellular Carcinoma, but Not Intrahepatic Cholangiocarcinoma
Source: MDPI journal article supplement (doi:10.3390/biomedicines11092471), 2023-09-06
Supplement: s1 [file s1]

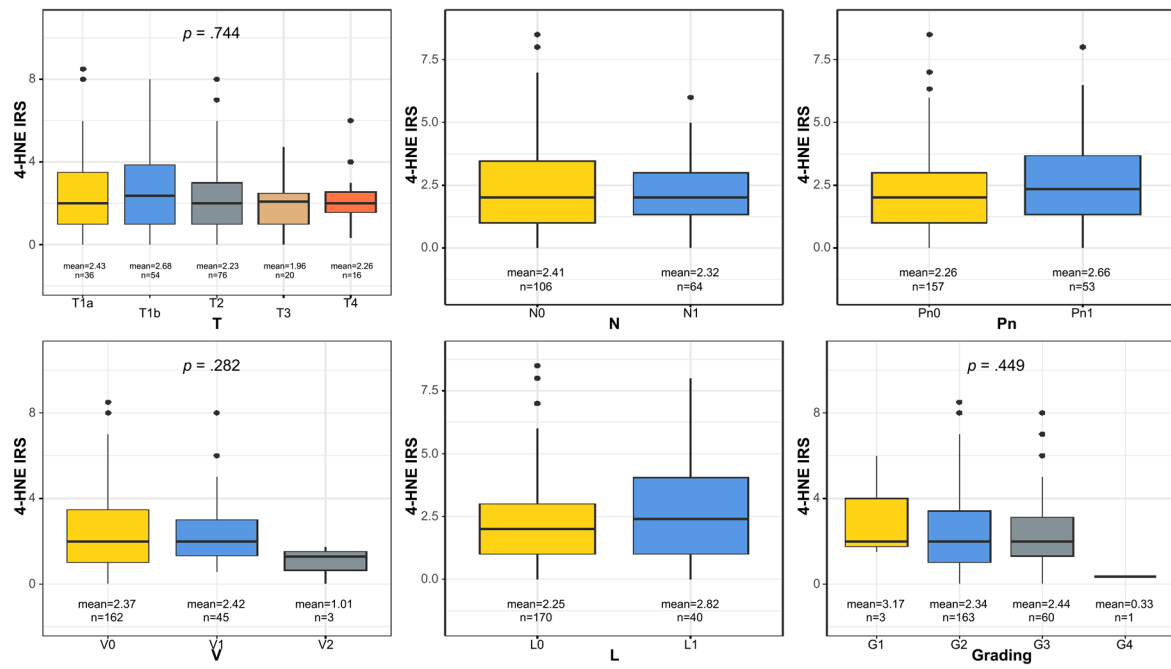

**Figure S1:** Box plot analysis of 4-HNE IRS and clinicopathological features in intrahepatic cholangiocarcinoma (iCCA).
